# Sleep-specific changes in physiological brain pulsations

Helakari H<sup>1,2,3</sup>, Korhonen V<sup>1,2,3</sup>, Holst SC<sup>4</sup>, Piispala J<sup>2,3,5</sup>, Kallio M<sup>2,3,5</sup>, Väyrynen T<sup>1,2,3</sup>, Huotari N<sup>1,2,3</sup>, Raitamaa L<sup>1,2,3</sup>,  
Tuunanen J<sup>1,2,3</sup>, Kananen J<sup>1,2,3</sup>, Järvelä M<sup>1,2,3</sup>, Raatikainen V<sup>1,2,3</sup>, Borchardt V<sup>1,2,3</sup>, Kinnunen H<sup>6</sup>, Nedergaard M<sup>7,8</sup> and  
Kiviniemi V<sup>1,2,3</sup>

## Affiliations

<sup>1</sup> Oulu Functional NeuroImaging (OFNI), Department of Diagnostic Radiology, Oulu University Hospital, Oulu, Finland

<sup>2</sup> Medical Imaging, Physics and Technology (MIPT), Faculty of Medicine, University of Oulu, Oulu, Finland

<sup>3</sup> Medical Research Center (MRC), Oulu, Finland

<sup>4</sup> Neurobiology Research Unit, University of Copenhagen, Copenhagen, Denmark

<sup>5</sup> Clinical Neurophysiology, Oulu University Hospital, Finland

<sup>6</sup> Oura Health Ltd.'s, Oulu, Finland

<sup>7</sup> Center of Translational Neuromedicine, University of Copenhagen, Copenhagen, Denmark

<sup>8</sup> Center of Translational Neuromedicine, University of Rochester, Rochester NY, US

## Corresponding Author

Vesa Kiviniemi, Prof, MD

vesa.kiviniemi@oulu.fi

Department of Diagnostic Radiology, Medical Research Center (MRC), Oulu University Hospital, Kajaanintie 50, 90220, Oulu

Heta Helakari, MSc

heta.helakari@oulu.fi

Department of Diagnostic Radiology, Medical Research Center (MRC), Oulu University Hospital, Kajaanintie 50, 90220, Oulu

## Short title

Sleep changes brain pulsations

29 **Abstract**

30 Sleep is known to increase the convection of interstitial brain metabolites along with cerebrospinal fluid (CSF). We used ultrafast  
31 magnetic resonance encephalography (MREG<sub>BOLD</sub>) to quantify the effect of sleep on physiological (vasomotor, respiratory and  
32 cardiac) brain pulsations driving the CSF convection in humans. Transition to electroencephalography verified sleep occurred in  
33 conjunction with power increase and reduced spectral entropy (SE) of physiological brain pulsations. During sleep, the greatest  
34 increase in spectral power was in very-low frequency (VLF < 0.1 Hz) waves, followed by respiratory and cardiac brain  
35 pulsations. SE reduction coincided with decreased vigilance in awake state and could robustly (ROC 0.88,  $p < 0.001$ ) differentiate  
36 between sleep vs. awake states, indicating the sensitivity of SE of the MREG<sub>BOLD</sub> signal as a marker for sleep level. In conclusion,  
37 the three physiological brain pulsation contribute to the sleep-associated increase in glymphatic CSF convective flow in an  
38 inverse frequency order.

39

40 **Keywords**

41 ultrafast fMRI, spectral entropy, brain pulsations, spectral power, CSF, glymphatic system

42

43 **Highlights:**

44

- 45 • Brain tissue contains almost no connective tissue, this enabling pressure waves to initiate long-distance brain  
46 pulsations
- 47 • Brain pulsations are induced by vasomotion, respiration, and the cardiac cycle
- 48 • Sleep strikingly increases spectral power and decreases spectral entropy of brain pulsations, especially for the very  
49 low frequency vasomotor waves
- 50 • Spectral entropy of brain pulsations detected by MREG is a sensitive measure of vigilance, resembling the  
51 corresponding entropy changes detected by scalp EEG

52 **List of Abbreviations.**

53 American Academy of Sleep Medicine (AASM), analysis of functional neuroimaging software toolbox (AFNI), area under curve  
54 (AUC), awake scan 1-2 (A1-A2), ballistocardiographic (BCG), blood oxygen level dependent (BOLD), Cambridge  
55 Neuropsychological Test Automated Battery (CANTAB), carbon dioxide (CO<sub>2</sub>), cerebrospinal fluid (CSF), direct current (DC),  
56 degrees of freedom (df), eyes closed scan (EC), electroencephalography (EEG), Electrical Geodesics (EGI), flip angle (FA), fast  
57 Fourier transform (FFT), functional magnetic resonance imaging (fMRI), functional magnetic resonance imaging of the brain  
58 (FMRIB), field of view (FOV), FMRIB software library (FSL), family wise error (FWE), matrix laboratory software  
59 (MATLAB), motion correction using FMRIB's linear image registration tool (MCFLIRT), Montreal Neurological Institute  
60 (MNI), magnetization prepared rapid gradient echo (MPRAGE), magnetic resonance encephalography (MREG), N1 (light  
61 sleep), N2 (intermediate sleep with sleep spindles and/or K-complexes), N3 (slow wave sleep), non-rapid eye movement  
62 (NREM), Oulu functional neuroimaging group (OFNI), paired-associate learning (PAL), REM (sleep with rapid eye  
63 movements), receiver operating curve (ROC), region of interest (ROI), reaction time (RTI), sleep scans 1-4 (S1-S4), spectral  
64 entropy (SE), fingertip oxygen partial saturation (SpO<sub>2</sub>), echo time (TE), threshold-free cluster enhancement (TFCE), repetition  
65 time (TR), very low frequency (VLF 0.008 - 0.1 Hz).

## 66 **Introduction**

67  
68 A rarely considered feature of the mammalian brain is that its neural tissue consists of almost 80% water, with a near absence of  
69 connective tissue. Combined with the physical constraint of floating in cerebrospinal fluid (CSF) embedded within an  
70 incompressible cranial vault, physiological pressure changes can thus drive brain-wide pulsations and fast fluid movement within  
71 the neuropil. In the early 20<sup>th</sup> century studies of pulsatile brain activity that lead to the invention of electroencephalography  
72 (EEG) for external detection of electrophysiological brain activity, Hans Berger also described three forms of brain pressure  
73 pulsations: “eine pulsatorische, eine respiratorische und vasomotorische Bewegung” (Berger, 1901) (pulsatory, respiratory and  
74 vasomotor movements). Nearly a century later, the same triad of cardiovascular, respiratory and slow, spontaneous vasomotor  
75 waves driven by arteries, can be non-invasively imaged throughout brain by magnetic resonance encephalography (MREG), a  
76 ultrafast variant of functional magnetic resonance imaging (fMRI) (Kiviniemi et al., 2016). MREG was invented specifically to  
77 maximize temporal accuracy while still maintaining adequate image quality for high frequency mapping of the fMRI blood  
78 oxygen level dependent (BOLD) signal.

79  
80 Prior reports in rodents showed that natural sleep and certain anesthetic regimens can induce a sharp increase in the influx of  
81 CSF to brain tissue, suggesting a transition to a state more permissive to fluid dispersion (Xie et al., 2013). Human EEG studies  
82 link increased slow wave activity during sleep with decreases in cerebral blood volume that are consistently followed by greater  
83 influx of CSF into the fourth ventricle (Fultz et al., 2019). Insofar as EEG is a marker of net neural activity, its association with  
84 CSF movement is most conspicuous during sleep, when brain activity is relatively quiescent. Given this background, we tested  
85 the hypothesis that MREG imaging could reveal consistent changes in fluid pulsation within the neuropil during the transition  
86 of healthy human subjects from wakefulness to natural sleep.

87  
88 In support of our hypothesis, we observed striking increases in the brain pulsation induced by each of the three types of pressure  
89 waves as the subjects entered an EEG-verified NREM sleep state. Power spectrum analysis revealed that the rank order of the  
90 enhanced brain pulsations during NREM sleep were slow vasomotion > respiration > cardiac cycle. Similar to analogous EEG  
91 results acquired during sleep (Burioka et al., 2005; Liang, Kuo, Hu, Pan, & Wang, 2012; Mahon, Greene, Lynch, McNamara, &  
92 Shorten, 2008; Rodríguez-Sotelo et al., 2014; Vakkuri et al., 2005), the entropy of the MREG brain pulsation power spectrum  
93 was consistently and specifically decreased during NREM sleep, thus allowing higher sensitivity in the prediction of sleep state  
94 than are afforded by scoring of EEG recordings in 30 s epochs based on American Academy of Sleep Medicine (AASM)  
95 guidelines for clinical sleep recordings. Taken together, these observations confirm that the hydrostatic properties governing  
96 CSF movement in the brain are potently regulated across the sleep-wake cycle.

97

## 98 Results

99 Due both to technical reasons and historical convention, the hemodynamic BOLD signal ( $< 0.5$  Hz) and electrophysiological  
100 EEG ( $> 0.5$  Hz) signals have generally been measured in non-overlapping spatiotemporal windows. At present, technical  
101 advances enable synchronous high density direct-current (DC)-EEG to be measured synchronously with ultrafast 10 Hz  
102 MREG<sub>BOLD</sub> signal, which allows simultaneous whole brain assessment of hemodynamic and electrophysiological brain activity  
103 from temporally overlapping window extending from 0 to 5 Hz (Hiltunen et al., 2014; Keinänen et al., 2018; Richards, Boswell,  
104 Stevens, & Vendemia, 2015). Figure 1 depicts an example of sleep induced changes in the full 5 Hz band brain pulsations  
105 captured by simultaneous multimodal MREG and DC-EEG scanning over this wide range of low frequencies is illustrated in  
106 Figure 1.

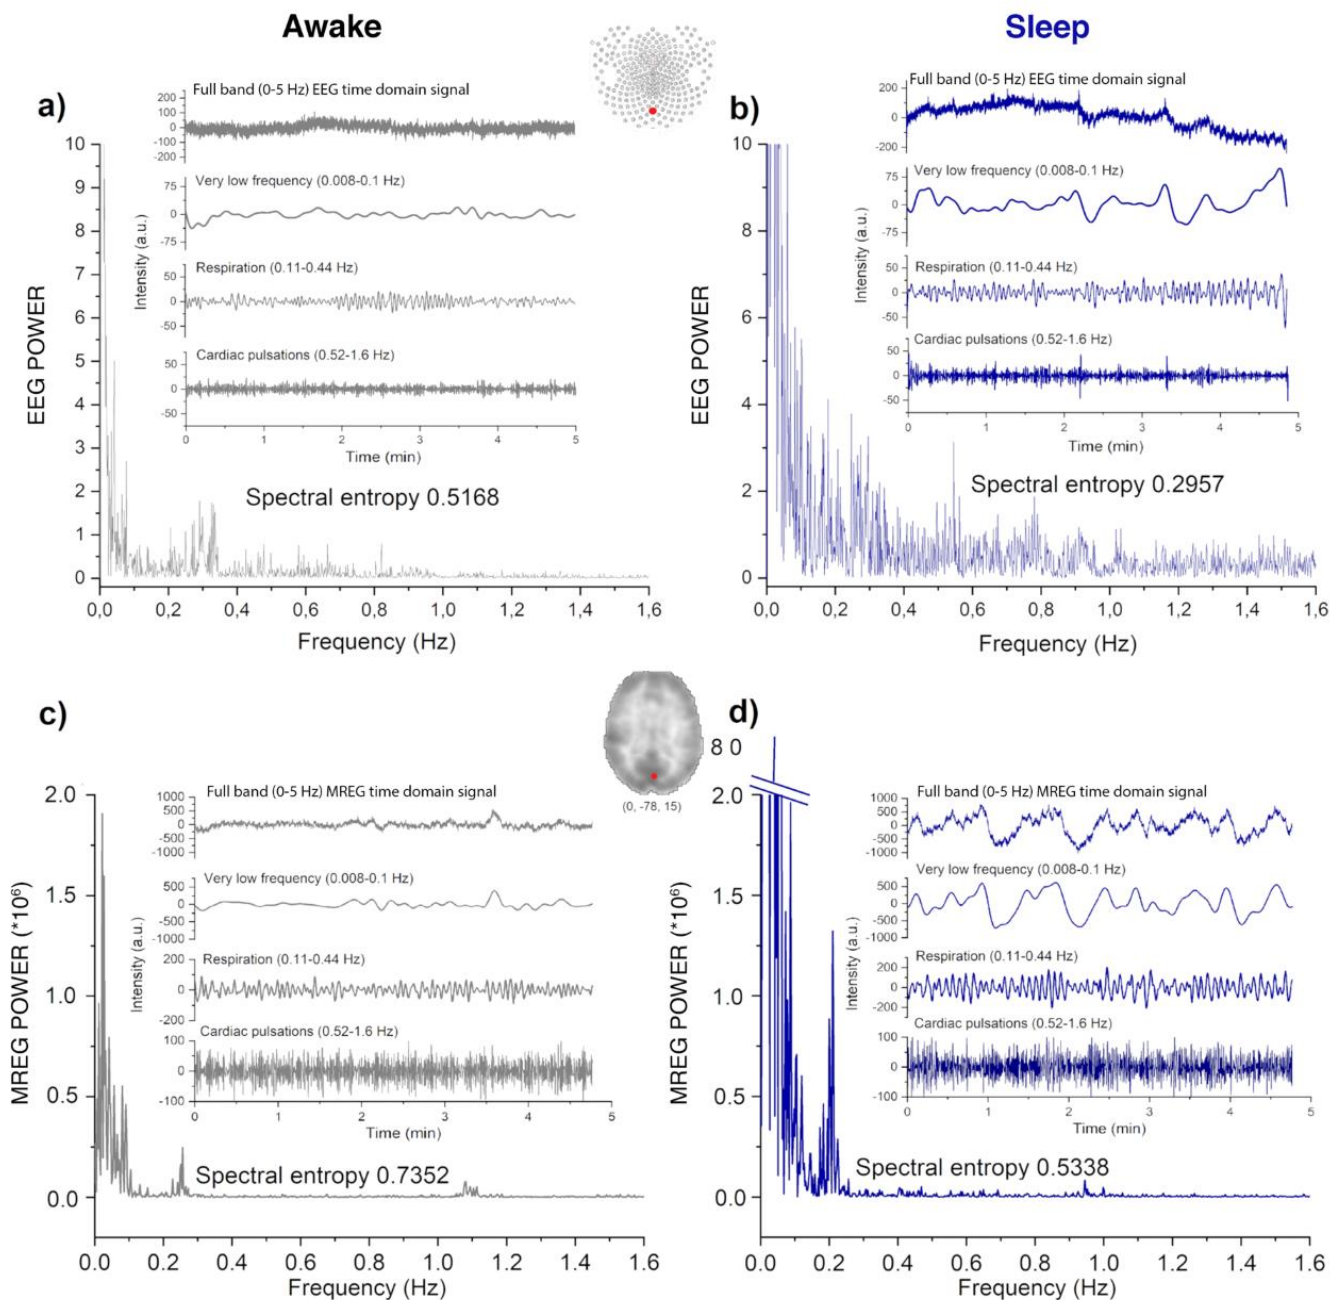

107  
108 **Figure 1. Examples of electrophysiological and dynamic brain pulsations measured in the same subject while awake and**  
109 **sleeping.** The data was measured simultaneously by a-b) 256 lead high density DC-EEG (Oz) and c-d) ultrafast 10 Hz MREG<sub>BOLD</sub>  
110 covering whole brain in 0 - 5 Hz. Time and frequency domain data both indicate increased power and amplitude of brain  
111 pulsations upon transition from EEG-verified fully awake state to fully NREM sleep. The dominant increase in VLF pulsation  
112 power reshapes the power spectrum distribution and alters the entropies of the EEG and MREG<sub>BOLD</sub> signals.  
113

## 114 **Spectral entropy of MREG signal predicts NREM sleep**

115 Based on pilot evidence for the successful measurement synchronous multimodal MREG and DC-EEG signal (Fig. 1), we  
116 recruited healthy subjects for a sleep monitoring study lasting an entire week. Subjects were scanned after a normal night's sleep  
117 and (three days later) after a monitored interval of wakefulness lasting  $24 \pm 1.5$  h. The sleep deprivation was used to induce drops  
118 in awake vigilance for multimodal monitoring of associated changes in physiological brain pulsations (Fig. 2a). After sleep  
119 deprivation, the subjects exhibited significantly increased reaction times, indicative of reduced vigilance (CANTAB RTI test:  
120  $427 \pm 25 > 403 \pm 29$  msec,  $p=0.002$ ) compared to neuropsychology test results during an awake scan following a normal night's  
121 sleep (Supplementary Fig.1).

122  
123 Spectral entropy (SE) of brain EEG signals is known to reflect vigilance, sleep and depth of anesthesia (Burioka et al., 2005;  
124 Liang et al., 2012; Rodríguez-Sotelo et al., 2014). We compared the fitness of SE in MREG<sub>BOLD</sub> data versus SE in simultaneously  
125 measured EEG recordings to predict vigilance. The EEG data were analyzed and scored as awake or sleep according to standard  
126 AASM EEG sleep scoring criteria. The SE evaluated over the whole brain (SE<sub>GLOBAL</sub>) revealed a negative linear relationship  
127 ( $r_{\text{pearson}}=-0.35$ ;  $p = 0.002$ , degrees of freedom, df 29, Supplementary Fig. 2a) with EEG-weighted sleep scoring as a function of  
128 scan epochs. We focused our analysis on the corresponding of MREG<sub>BOLD</sub> SE in a region of interest (SE<sub>ROI</sub>) in the right visual  
129 cortex, which we selected due to the from known changes in posterior VLF pulsation during sleep (Chang et al., 2016; Liu et al.,  
130 2018). This comparison indicated a nearly two-fold stronger correlation for MREG<sub>BOLD</sub> SE with the EEG-weighted sleep score  
131 ( $r_{\text{pearson}}=-0.6$ ,  $p < 0.001$ , df 29, Supplementary Fig. 2b). Furthermore, the AASM EEG sleep score data in EEG-verified scan  
132 epochs showed a similar linear relationship to the amount of sleep ( $r = -0.952$ ,  $p=0.01$ ) as did the individual MREG<sub>BOLD</sub> SE<sub>ROI</sub>  
133 ( $r = -0.956$ ,  $p=0.01$ ) and SE<sub>ROI</sub> measured from all subjects ( $r = -0.981$ ,  $p=0.003$ ), thus confirming the fitness of SE<sub>ROI</sub> as a measure  
134 of sleep (Figs. 2b-e). The accuracy by which the SE<sub>ROI</sub> separated sleep from wakefulness episodes in MREG<sub>BOLD</sub> data was further  
135 tested against EEG-weighted sleep scoring of selected scan epochs using receiver operating curve (ROC) analysis. Here, we  
136 compared EEG-verified awaking epochs ( $n = 30$ , EEG-weighted sleep score = 0) against sleep ( $n = 30$ , EEG-weighted sleep  
137 score  $\geq 10$ ). The ROC analysis of SE<sub>ROI</sub> separated sleep from waking state with high accuracy (AUC=0.88,  $p<0.001$ , Fig.2f).  
138 Whole brain SE<sub>GLOBAL</sub> accuracy had lower sensitivity for this discrimination (AUC=0.77,  $p<0.001$ , Supplementary Fig. 2c)  
139 compared to the occipital SE<sub>ROI</sub> approach.



**a) Study protocol**

| Sleep tracking |                    |                     |                     |          |                             |                    |                      |                      |                      |                      |
|----------------|--------------------|---------------------|---------------------|----------|-----------------------------|--------------------|----------------------|----------------------|----------------------|----------------------|
| Day1           | Day2               |                     |                     | Day3     | Day4                        | Day5               |                      | Day6                 | Day7                 |                      |
|                | Awake scan session |                     |                     |          |                             | Sleep scan session |                      |                      |                      |                      |
|                |                    | Scan 1              | Scan 2              |          |                             | Scan 1             | Scan 2               |                      |                      |                      |
|                | Cantab test        | A <sub>1</sub> (1%) | A <sub>2</sub> (1%) | EC (32%) | Night4<br>Sleep deprivation | Cantab test        | S <sub>1</sub> (72%) | S <sub>2</sub> (87%) | S <sub>3</sub> (77%) | S <sub>4</sub> (72%) |

**b) EEG sleep states**

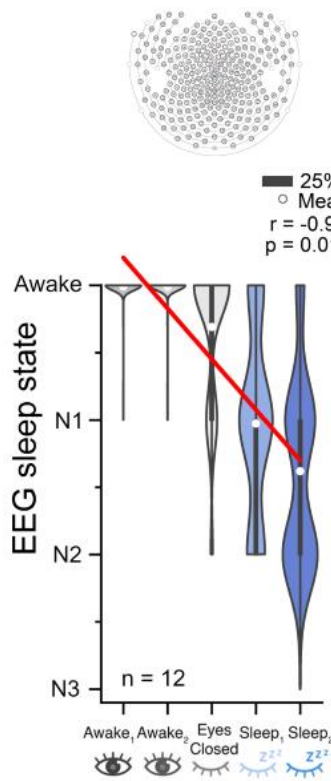

**c) EEG verified MREG data d) All subjects MREG data**

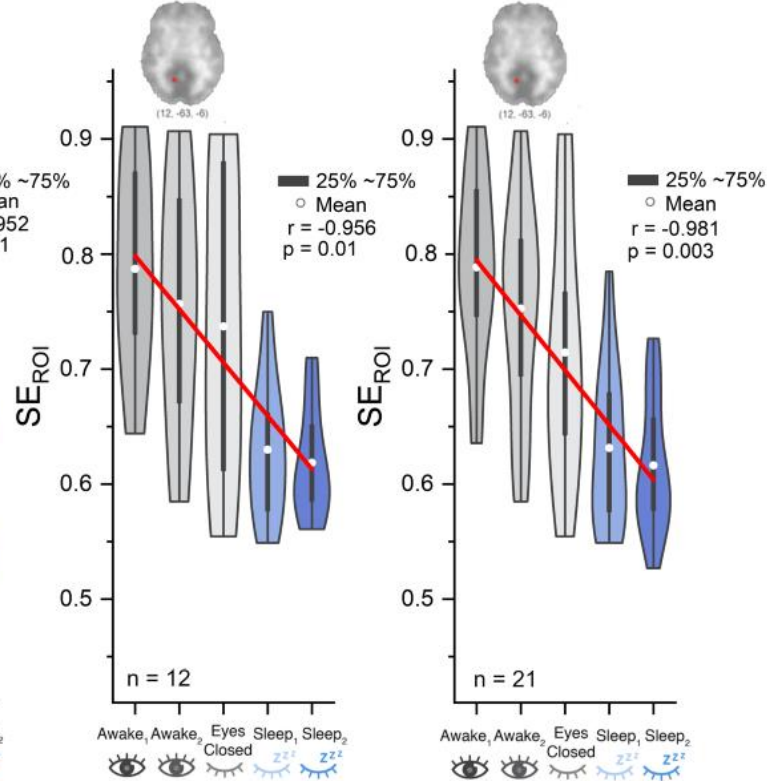

**e) EEG verified sleep**

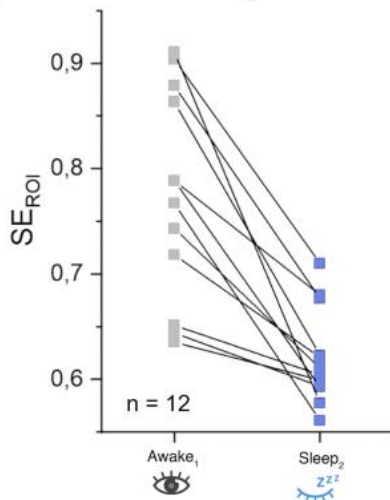

**f) MREG accuracy for SE sleep detection**

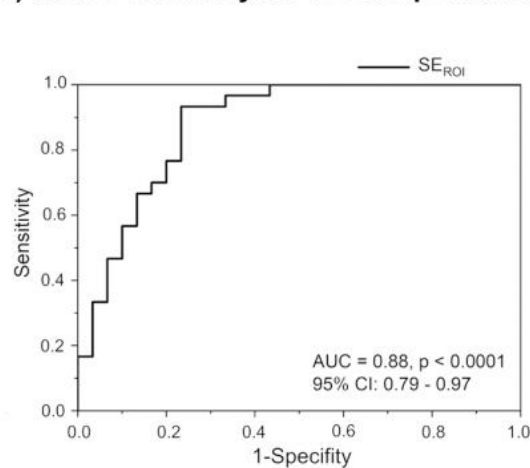

140

141 **Figure 2.** a) Study protocol shows overall study design through one week of sleep monitoring. Awake scanning session was  
 142 arranged on a day two after a good night of sleep. Sleep scanning session was arranged on day five, after a night of sleep  
 143 deprivation on the preceding night. b) EEG sleep state data show that the amount and depth of sleep both increase as a function  
 144 of scan epoch. Visual cortex  $SE_{ROI}$  of  $MREG_{BOLD}$  data predicts sleep and wakefulness across subjects both in c) EEG-verified  
 145 cases ( $n = 12$ ) and d) all for all cases ( $n = 21$ ) as a function of scan epoch, resembling corresponding results for EEG-verified  
 146 sleep states. Results indicate linear declines both in EEG sleep state and  $MREG_{BOLD}$   $SE_{ROI}$  values as a function of scan epoch in  
 147 the experiment. The amount of NREM sleep also increased in the successive scans, based on EEG-verified data. e) The  $SE_{ROI}$   
 148 showed a clear drop in all subjects in the transition from waking to EEG-verified sleep states S2. f) The ROC curve of  $SE_{ROI}$  data  
 149 indicates high accuracy  $AUC = 0.88$  ( $p < 0.0001$ ) in the ability to separate sleep ( $n = 30$  sleep epoch scans) from awake data  
 150 ( $n = 30$  epochs), an effect also observed in the whole brain  $SE_{GLOBAL}$  signal (supplementary Fig 2.).  
 151

152 **Spatial MREG<sub>BOLD</sub> SE change in vigilance and sleep.**

153 During routine fMRI scanning, decreasing vigilance during the first 3-5 minutes manifests in typical alterations in the BOLD  
154 signal (Tagliazucchi & Laufs, 2014). To analyze how decreased vigilance alters the SE of MREG<sub>BOLD</sub> data, we compared the  
155 first five-minutes of scan 1 (A1 epoch 0-5 min) to the last five-minutes (A2 epoch, 5-10 min, i.e. A1 vs. A2 epochs). The SE in  
156 the final five-minutes of the MREG<sub>BOLD</sub> signal was significantly lower than in the first five-minutes ( $p < 0.05$ ,  $df = 20$ , Fig 3b),  
157 although EEG sleep scoring did not detect significant sleep episodes on in either A1 or A2, each of which showed a single 30  
158 sec N1 sleep episode. Eye closure (EC) has also been shown to reduce flow and increase BOLD fluctuations in visual cortex  
159 (Zou et al., 2015). In our study, the EC increased VLF power (as previously reported by (Zou et al., 2015), and indeed produced  
160 an even more pronounced SE decrease over the visual cortex and other posterior brain areas (A1 vs. EC,  $p < 0.05$  FWE corrected,  
161  $df = 20$ , c.f. Fig 3b). The EEG sleep verification also showed higher prevalence of 30 sec time segments of sleep (in total 42 sleep  
162 time segments from 7/12 subjects) during awake eye closure. However, there was no difference in SE when comparing the effect  
163 of eye closure to scan duration (A2 vs. EC). The sleep epoch S2 showed the largest spatial extent with decreased in SE of the  
164 MREG<sub>BOLD</sub> signal compared to awake epoch A1, covering most of the posterior brain area, Fig. 3a ( $A1 > S2$ ,  $p < 0.05$ ,  $df = 20$ ).

165



## Spatial distribution of MREG spectral entropy

### a) Scan based (n = 21)

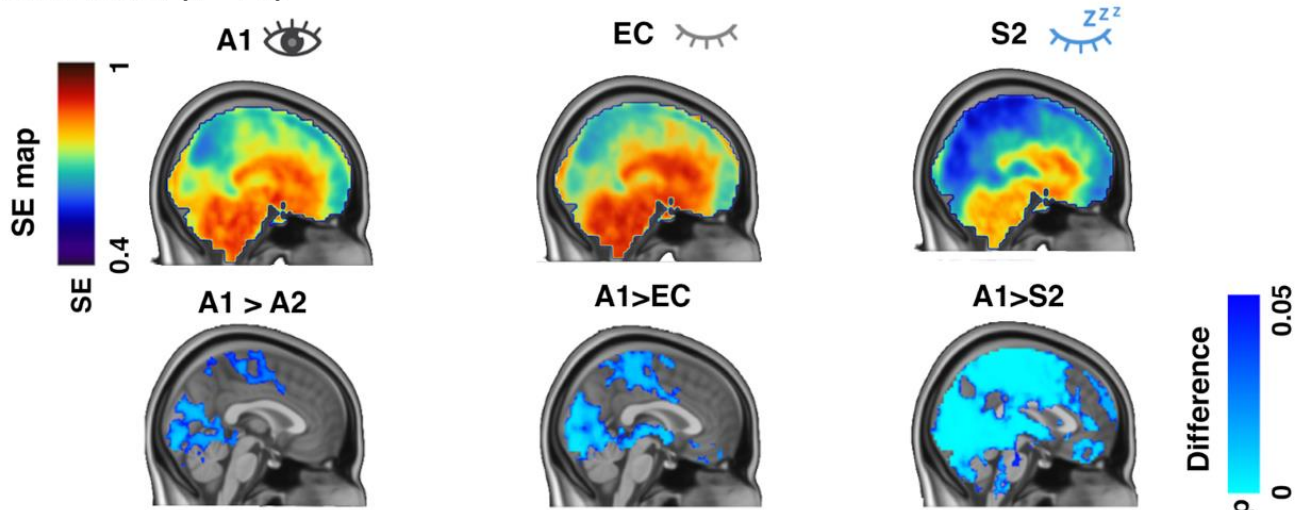

### b) EEG based (n = 30)

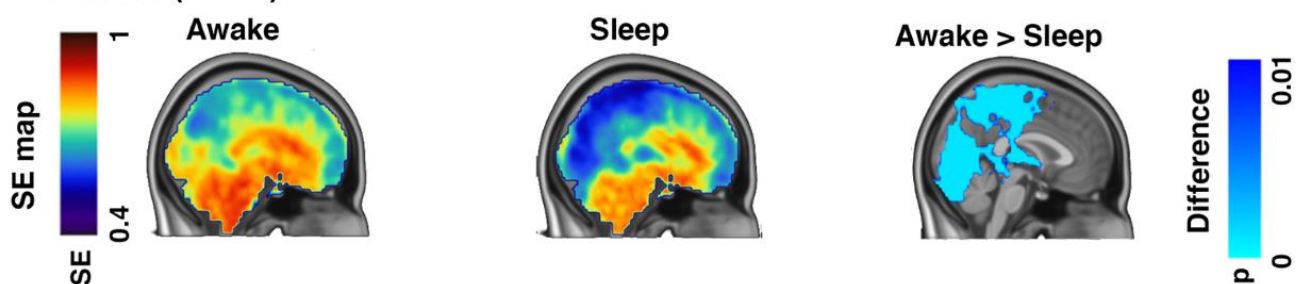

### c) MREG SE based (n = 30)

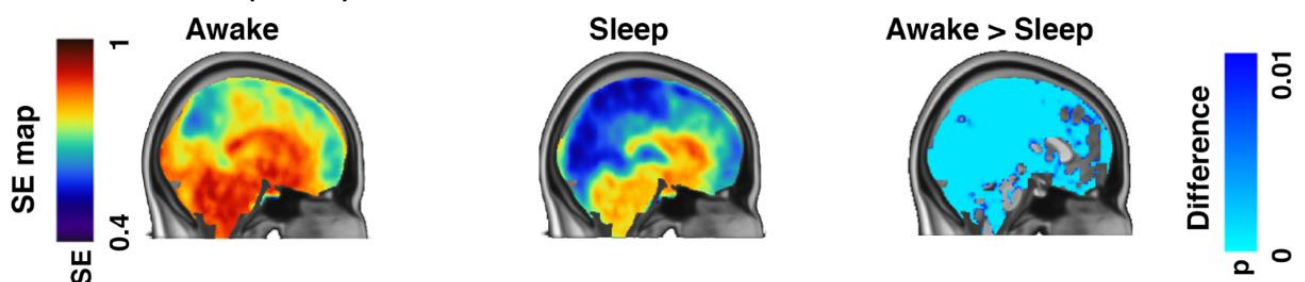

166

167 **Figure 3. Spatial distribution of the sleep-induced reduction of full band MREG<sub>BOLD</sub> spectral entropy (SE) signal in posterior**  
 168 **and temporal parts of the brain.** a) Scan based analyses illustrate ( $p < 0.05$ ,  $df 20$ ) how SE reduces in association with declining  
 169 vigilance level with increasing scan duration (A1 (0-5 min) > A2 (5-10 min), eye closure (A1 > EC) and sleep scan effect (A1 >  
 170 S2), when pooling data from all 21 subjects. When considering only awake ( $n = 30$ ) and deepest sleeping scan epochs ( $n = 30$ ),  
 171 based on b) EEG-weighted sleep score and c) especially for the MREG<sub>BOLD</sub> SE<sub>ROI</sub> sleep score, the SE reductions had markedly  
 172 higher statistical significance ( $p < 0.01$ ,  $df 29$ ). In practice, the SE changes occur in posterior brain areas, notably around  
 173 primary sensory regions and their associative areas (visual, sensorimotor, auditory).  
 174

175 The EEG sleep scores also indicated that not all subjects were able to sleep during the morning multimodal fMRI scanning  
 176 procedure, despite their sleep deprivation in the preceding night (Supplementary table 1-2). Therefore, to analyze *only* sleep  
 177 effects with the clearest possible differentiation between waking and sleep states, we contrasted the 30 deepest individual sleep  
 178 five-minute scan epochs with the 30 most awake scan epochs, based both on i) EEG-weighted sleep scores, and ii) MREG<sub>BOLD</sub>  
 179 SE<sub>ROI</sub> criterion, in separate analyses. Irrespective of the criterion, the entire occipital, parietal and temporal lobes and cerebellum  
 180 exhibited significant reductions in SE (Fig. 3 b-c,  $p < 0.01$ ,  $df 29$ ), whereas parts of the frontal lobe did not show SE changes.  
 181 The EEG-scored and MREG<sub>BOLD</sub> results showed overlapping SE reductions in the parietal and occipital regions, mostly

182 concentrated near the somatosensory regions. However, the strength and spatial spread of the SE reduction were smaller in EEG-  
183 verified sleep scans compared to MREG<sub>BOLD</sub> SE<sub>ROI</sub>-based results.

184

185 **Sleep increases the power of the brain pulsations.**

186 We further measured the power of each physiological brain pulsation with fast Fourier transform (FFT) analysis. Figure 4 shows  
187 the FFT power spectra changes from a ROI in the visual cortex (SE<sub>ROI</sub>, MNI coordinates: 12, -63, -6) and Figures 4 and 5 show  
188 the power changes across all voxels to evaluate the relative contributions of the physiological brain pulsations (VLF 0.008 - 0.1  
189 Hz, respiratory 0.11 - 0.44 Hz, and cardiac 0.52 – 1.6 Hz) at different states of consciousness (Figs. 4-5). The VLF power was  
190 significantly higher already after eye closure during an EC scan ( $p < 0.05$ , df 20), and increased in the deepest average sleep scan  
191 S<sub>2</sub> ( $p < 0.05$ , df 20) in comparison to the awake A1 scan in all 21 subjects. In EEG-verified sleep epochs, and more strongly in  
192 MREG<sub>BOLD</sub> SE based sleep epochs, the VLF power increased ( $p < 0.05$ , df 29) in comparison to wakefulness (Figs. 4-5,  
193 Supplementary table 3). The power of respiration pulsations was similarly increased in sleep versus awake time segments ( $p <$   
194  $0.05$ , df 29). The cardiac pulsation power increased to a lesser degree in both the EEG-based and SE<sub>ROI</sub>-based MREG data ( $p <$   
195  $0.05$ , df 29). Previous work showed that heart rate variability increases in sleep, especially when respiratory frequencies fall  
196 below 0.5 Hz (Cajochen, Pischke, Aeschbach, & Borbély, 1994; Elsenbruch, Harnish, & Orr, 1999; Kondo et al., 2014).  
197 Similarly, our spectral analyses of the variability of the cardiac pulse frequency also increased from a single 1 Hz peak multiple  
198 frequency peaks ranging from 0.7 – 1.4 Hz (Fig. 4).

199

## Spectral power

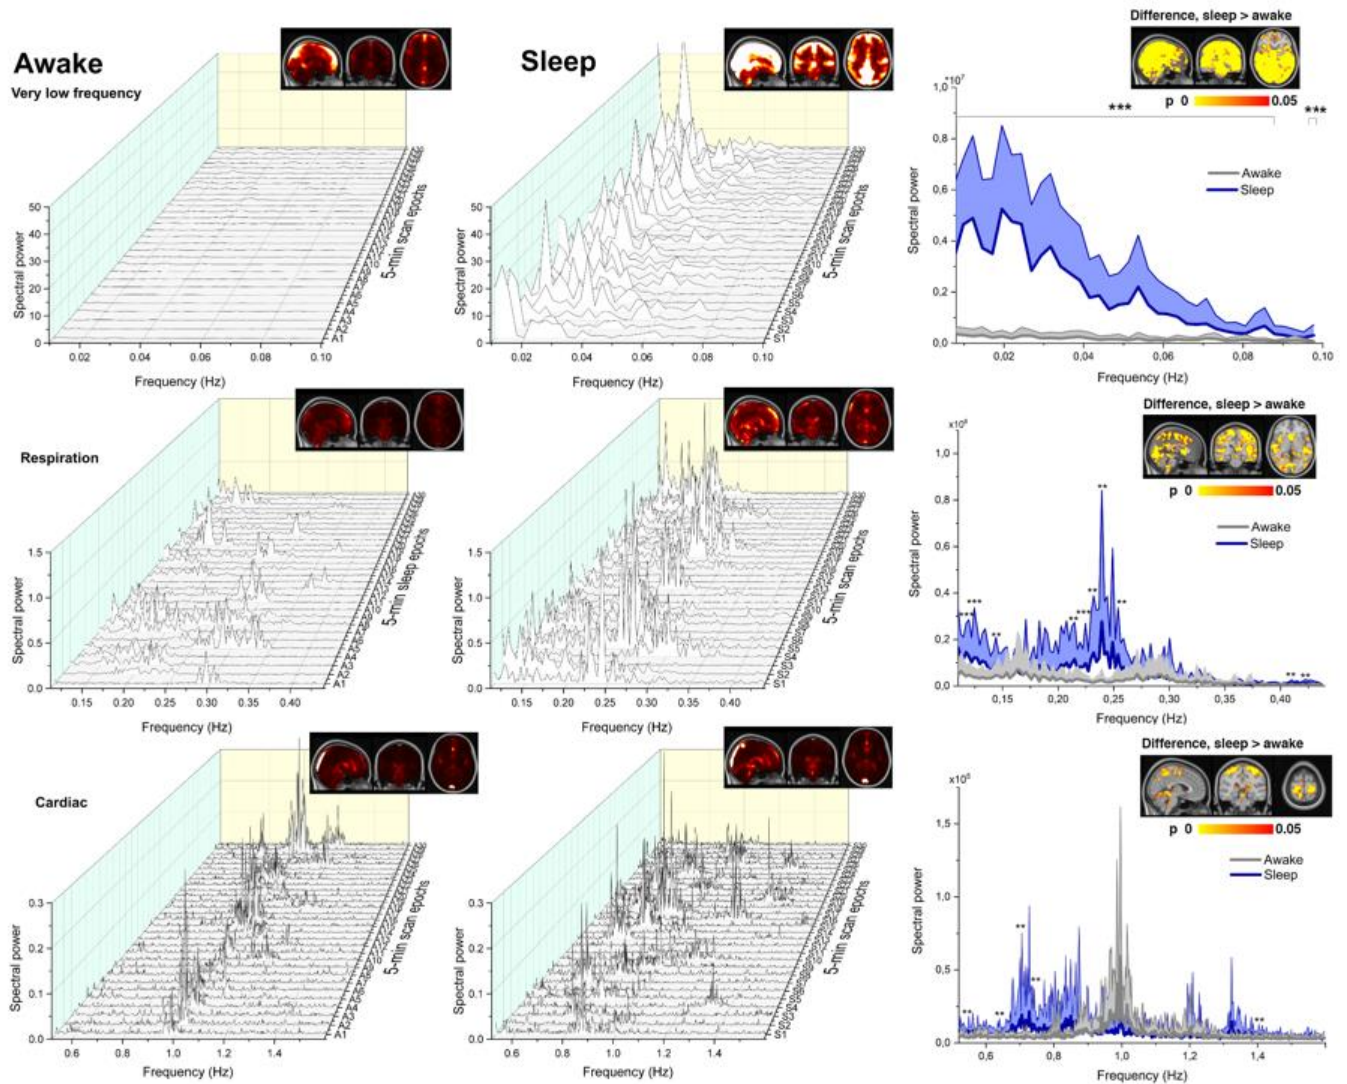

200

201 **Figure 4. Sleep sharply changes the power spectrum of physiological brain pulsations.** Power spectra from MREG<sub>BOLD</sub> data  
 202 from the visual cortex (MNI 12, -63, -6) from the most awake and deepest sleep data, as verified by SE<sub>ROI</sub>. The VLF pulsation  
 203 is low in awake data, and increases markedly in sleep. The respiratory pulsation also increases significantly upon transition to  
 204 sleep, although to a lesser extent than VLF. The cardiac pulsation power also increases and the variability of the cardiac  
 205 pulsation power increases from a single 1 Hz peak into a range of frequencies from 0.7-1.4 Hz. ( $p < 0.001$  \*\*\*,  $p < 0.01$  \*\*,  $p$   
 206  $< 0.05$  \*,  $df$  29).  
 207

### 208 Spatial extent of sleep induced entropy and power changes in each type of physiological brain pulsation

209 The spatial extent of the effect of sleep state on physiological pulsation entropy and power were also evaluated for each of the  
 210 three pulsation frequency ranges, based both on MREG<sub>BOLD</sub> SE<sub>ROI</sub> and EEG-weighted sleep score data. Much as with SE<sub>ROI</sub> sleep  
 211 and vigilance results, the MREG<sub>BOLD</sub> SE-based scoring also yielded robust FFT power spectrum results for each pulsation type.  
 212 The largest power change was the increase in VLF power covering almost the entire posterior part of the brain, matching the  
 213 pattern of SE change (MREG<sub>BOLD</sub> SE vs. power  $fslcc = 0.9$ , Figs. 4-5). Furthermore, in solely awake data, the VLF power was  
 214 significantly lower in the MREG<sub>BOLD</sub> signal when verified based on MREG SE<sub>ROI</sub> vs. EEG-verified ( $p < 0.001$ ,  $df$  29), indicating  
 215 higher sensitivity of MREG<sub>BOLD</sub> SE-based scoring also for detecting vigilance-related VLF changes (Supplementary Fig 3).  
 216

216

217 The respiratory pulsation power in the brain was also increased significantly in sleep ( $p < 0.01$ ,  $df$  29, Figs. 4-5). The peak mean  
 218 change was located in upper posterior brain areas overlapping with the regions showing a VLF increase. Although clearly



219 statistically significant, the increase was not as strong as the VLF power change (Figs. 4-5). The most significant power increase  
 220 occurred along the bilateral central sulcus, thus involving both sensorimotor cortices, close to auditory cortices mainly of the left  
 221 (dominant) hemisphere, and, over visual V1-V2 and V5 areas predominantly on the right side, and upper dorsal regions of the  
 222 cerebellum. Again, the EEG-verified sleep data had smaller respiratory power increases than that from MREG<sub>BOLD</sub> SE<sub>ROI</sub> based,  
 223 but both findings of increased power overlapped in the visual upper cortex (Supplementary Fig. 3). In contrast to the occipital  
 224 VLF increase, the increase in respiratory frequency SE was located more towards the basal brain structures, with less overlap  
 225 with the power changes in upper posterior regions.

226

227 The power of cardiac pulsation increased during sleep around sensorimotor areas and in the superior cerebellum ( $p < 0.05$ , df  
 228 29). Notably, the SE of the cardiac pulsation also showed a small drop in the parietal area, and interestingly two areas of *increased*  
 229 SE, which stood in contrast to findings for VLF and respiratory frequencies. Eye closure EC (A1 vs. EC,  $p < 0.05$ , df 20) caused  
 230 an increase in the power for cardiac and VLF entropy frequencies, but not in respiratory pulsations (Supplementary Fig.5).

231

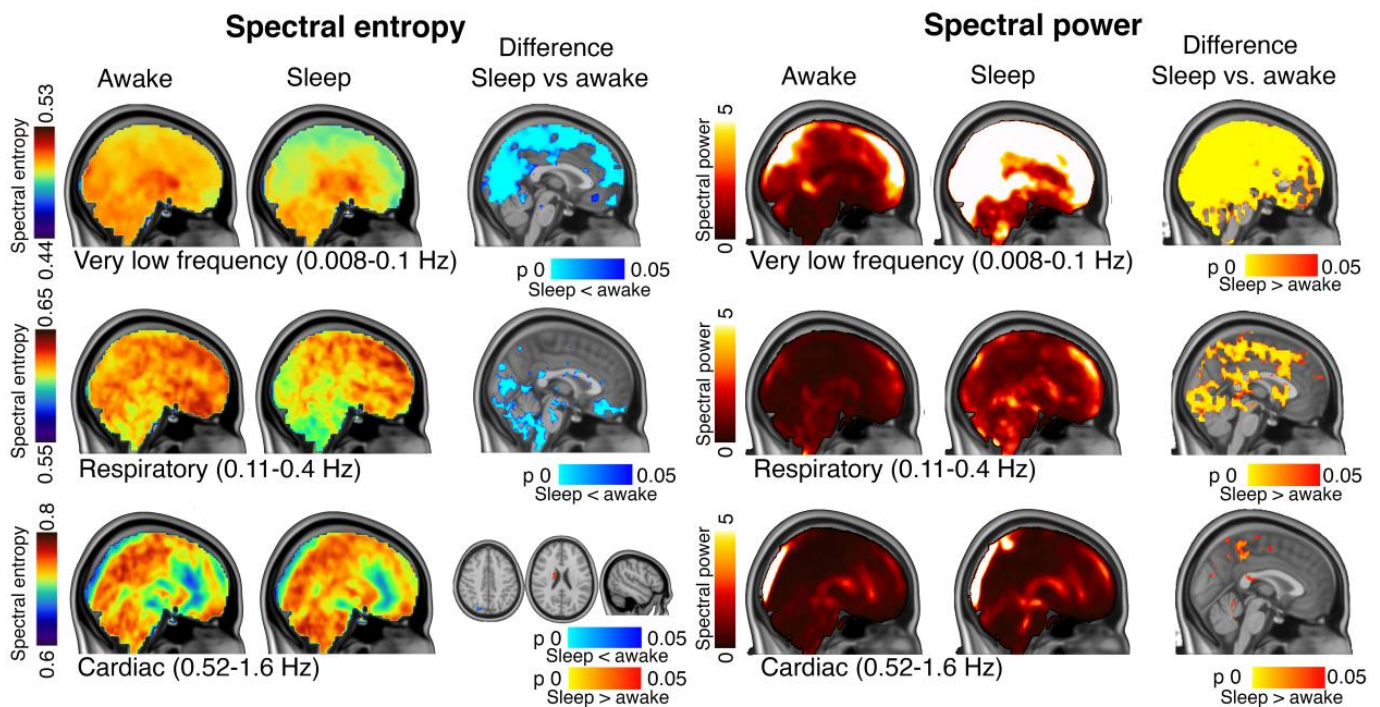

232

233 **Figure 5. Spatial distribution of spectral brain pulsation entropy (SE) and power are linked to frequency band.** Spectral  
 234 entropy (left panel) and spectral power (right panel) in each pulsations frequency band in five-minute epochs of awake and  
 235 deepest sleep based on MREG<sub>BOLD</sub> SE<sub>ROI</sub>, and their statistical difference maps ( $n = 30$  vs.  $30$  epochs,  $df = 29$ ). The three rows show  
 236 results in VLF, respiratory and cardiac frequencies, respectively. Each frequency range shows significant increases in power of  
 237 the physiological brain pulsations upon transition to sleep, although the spatial extents of the power and SE changes decline  
 238 with increasing frequency band. The spatial overlap of the power and entropy increases also diminishes as a function of frequency,  
 239 with largest overlap in the VLF range, partial overlap in the respiratory band, and no overlap in cardiac frequencies.

240

## 241 Discussion

242

243 We show in this study the spectral power of all three physiological pulsations of brain tissue increase during episodes of reduced  
 244 vigilance and especially in the transition of sleep. Once falling asleep, there is a redistribution of the brain pulsations spectrum

245 towards slower physiological brain pulsations, accompanied by a reduction in entropy in the spectral distribution. In fact, the SE  
246 of the brain pulsation signal in the visual cortex was an accurate marker for EEG-verified sleep epochs (ROC AUC=0.88, Fig  
247 2). This suggests that SE calculated directly from MREG<sub>BOLD</sub> brain scans serves for reliable data-driven monitoring of vigilance.

248

249 After separately analyzing the three main physiological pulsation in the ultrafast MREG<sub>BOLD</sub> data, it became evident that the  
250 power increases in sleep with an inverse relation to the frequency. Thus, VLF fluctuations showed the strongest increase,  
251 followed by the faster respiratory and then cardiovascular pulsations. The respiratory pulsations increased only during verified  
252 sleep epochs, whereas the spatial extent of VLF and the cardiovascular pulsations increased even during brief lapses in awake  
253 vigilance, and certainly in the early transition to sleep following 24 hours of sleep deprivation (Figs. 4-5 & supplementary Fig.  
254 5). Even slight reductions in awake vigilance state were associated with significantly reduced the SE and increased the power of  
255 brain pulsations to ultrafast MREG<sub>BOLD</sub>. Because these waking vigilance changes did not qualify as sleep episodes in EEG when  
256 using standard 30 s epochs, we argue that physiological brain pulsations offer a more sensitive tool for detecting lapses in  
257 physiological vigilance in the transition to sleep.

258

### 259 **VLF brain pulsations increase during transient drops in vigilance and predominate in sleep**

260 This is the first study to demonstrate brain-wide changes in the three major pulsation mechanisms in human brain during sleep.  
261 Our study was enabled by the ability of ultrafast MREG<sub>BOLD</sub> with 10 Hz sampling rate to critically separate cardiorespiratory  
262 and VLF signals in human brain without aliased mixing of the faster activity over the VLF signal (Huotari et al., 2019). Earlier  
263 literature on the conventional BOLD signal showed increased VLF fluctuations in posterior brain regions during light sleep and  
264 episodes of low vigilance, which is in accord with present results showing markedly increased VLF power in sleep (Chang et  
265 al., 2016; Liu et al., 2018; Wen & Liu, 2016). Although the low frequency BOLD fluctuations are widely attributed to  
266 functionally connected hemodynamic oscillations that are tightly coupled with waking state neuronal activity (Hutchison et al.,  
267 2013; Korhonen et al., 2014), part of the low frequency activity has also been linked to vasomotor waves or slow sinusoidal  
268 hemodynamic oscillations at ~0.1 Hz (Biswal, Bharat, Zerrin Yetkin, Haughton, & Hyde, 1995; Kiviniemi et al., 2000; Kiviniemi  
269 et al., 2016; Rayshubskiy et al., 2014; Wang et al., 2008).

270

271 Light sedation (Ramsey score 3) with intravenous midazolam increases brain VLF power significantly relative to the waking  
272 state (J. Kiviniemi et al., 2005). In this study, we show similarly increased power for very low pulsation frequencies (< 0.1 Hz)  
273 in conjunction with reduced SE of the pulsation. Hillmann and colleagues have similarly detected two separate VLF phenomena  
274 during anesthesia in mice; a 0.04 Hz fluctuation present only in anesthesia data overshadowed the faster hemodynamic changes  
275 coupled to spontaneous neuronal activity (Ma et al., 2016). Only upon removing the 0.04 Hz vasomotor fluctuation by filtering,  
276 there emerged the underlying the neuronal activity-coupled and functionally connected hemodynamic signal typical of  
277 spontaneous resting state networks. Furthermore, a recent paper showed a strong 0.05 Hz CSF pulsation in the fourth ventricle  
278 in human NREM sleep, which was coupled both the EEG theta power and 0.1 % BOLD signal oscillations (Fultz et al., 2019).

279 It seems plausible that, especially during sleep, the VLF BOLD signal might be affected by non-neuronal vasomotor waves at  
280 least to some degree.

281

282 Vasomotor waves are slow, seemingly spontaneous undulations in the arteriolar wall tension that control vessel wall pulsatility  
283 and local flow resistance, which consequently influence perfusion in downstream vascular territories (Preiss & Polosa, 1974).  
284 The vessel wall pulsatility in response to cardiac pressure waves serves as a driving force for the paravascular glymphatic CSF  
285 convection (Mestre et al., 2018). The force of the driving pulsation is dependent on various factors, including the circulatory  
286 perfusion pressure and elasticity of the vessel wall, both of which are under regulation from smooth muscle tonus in the arterial  
287 wall (Hadaczek et al., 2006). Vasomotor wave amplitude increases when blood perfusion pressure declines (Biswal, Bharat B.  
288 & Kannurpatti, 2009; Fujii, Heistad, & Faraci, 1990), and conversely, any increase in blood pressure reduces both the amplitude  
289 of vessel wall pulsation and paravascular CSF convection (Mestre et al., 2018). It seems likely that the increasing vasomotor  
290 waves in the arterial wall tension during sleep could facilitate vessel wall pulsatility and thereby promote paravascular CSF  
291 transport. If so, vasomotor waves during sleep could contribute to the glymphatic brain CSF transport and brain metabolite  
292 removal (Kiviniemi et al., 2016). The variations in arterial wall tension acutely affect blood vessel muscular thickness, and thus  
293 might modulate both perivascular space CSF volume and convection, but also contribute to parallel trafficking of water and  
294 metabolites via the *limitans externa* of the blood brain barrier wall into interstitium. This concept returns us to the theme that  
295 various pulsations are permissive to glymphatic flow.

296

### 297 **Respiratory pulsations increase specifically in sleep**

298 For the first time we present evidence that sleep specific brain pulsations change in phase with the respiratory frequency.  
299 Although it is known that the physiological pulsation can affect the BOLD signal, this interaction has not been widely studied  
300 due to technical limitations of conventional fMRI (Huotari et al., 2019; Kiviniemi et al., 2016). The acquisition of ultrafast  
301 MREG<sub>BOLD</sub> data enables robust separation of the cardiac and respiratory pulsations due to absence of signal aliasing (Huotari et  
302 al., 2019; Kiviniemi et al., 2016; Raitamaa et al., 2018) over the VLF frequencies.

303

304 During inspiration, the reduced intrathoracic pressure induces an outflow of venous blood from brain that is counterbalanced by  
305 an inward movement of CSF, as is a necessary consequence of the confinement of brain within the incompressible dural venous  
306 sinuses and intracranial space (Dreha-Kulaczewski et al., 2015; Dreha-Kulaczewski et al., 2017; Klose, Strik, Kiefer, & Grodd,  
307 2000; Vinje et al., 2019; Yamada et al., 2013). This mechanism is bound to also effect the perivenous CSF space, which together  
308 with counter phase venous blood volume changes creates a perivenous CSF pump. This pump can function to transmit respiratory  
309 pulsations into the neuropil. In addition, the pulmonary ventilation and upper airway resistance increase up to four-fold during  
310 sleep (Sowho, Amatory, Kirkness, & Patil, 2014; Trinder, Whitworth, Kay, & Wilkin, 1992; Wiegand, Zwillich, & White,  
311 1989; Worsnop, Kay, Pierce, Kim, & Trinder, 1998). The altered intrathoracic ventilation pressures may consequently increase



312 the driving (peri)venous pumping action in the brain, manifesting in altered respiratory frequency power in the MREG<sub>BOLD</sub> signal  
313 (Dreha-Kulaczewski et al., 2015; Matsumae et al., 2019; Vinje et al., 2019).

314  
315 The increases in respiratory and VLF brain pulsations with transition to sleep overlap in the posterior brain regions, and may be  
316 mediated by shared autonomic pressure control mechanisms. In contrast to VLF and cardiovascular brain pulsations, the  
317 respiratory pulsations do not increase with lower awake state vigilance (Supplementary Fig.5). Since respiratory brain pulsations  
318 increase during deeper stages of sleep than those required for increased cardiovascular pulsations, we hypothesize that the  
319 respiratory pulsations may be a main driving mechanism of glymphatic brain clearance in perivenous spaces, which further  
320 facilitates CSF convection during deep sleep. This prediction could be tested in future MREG<sub>BOLD</sub> conducted across the entire  
321 sleep cycle. The observed discrepancy in the anatomical distributions of entropy and power changes of the respiratory pulsations  
322 is another matter for further research, possibly in relation to differential control of vascular mechanisms or pressure/flow  
323 characteristics of these anatomical areas.

324

### 325 **Cardiovascular brain pulsation change in sleep.**

326 The entropy and power of the cardiovascular pulsations do not range as widely as those of VLF and respiratory pulsations. The  
327 variability of the pulsation increases with sleep, in accordance with previous knowledge about sleep-related cardiovascular  
328 pulsation changes (Cajochen et al., 1994; Elsenbruch et al., 1999; Kondo et al., 2014). The increased cardiac variability during  
329 sleep has been linked in part to the respiratory frequency increase (Elsenbruch et al., 1999) and the various cardiorespiratory  
330 pulsations could well interact, given their closely connected intrathoracic physiology. Furthermore, the frequency distribution of  
331 brain cardiovascular pulsation widens and moves towards slow frequencies during sleep (Fig. 4, Supplementary table 4). This  
332 could reflect the increased and more efficient CSF convection that occurs along with reduced heart rate during sleep, resembling  
333 the anesthetized state (Hablitz et al., 2019). Drift in cardiovascular pulsation frequency and variability during sleep is most likely  
334 related to reduced sympathetic drive (Somers, Dyken, Mark, & Abboud, 1993), as are likewise the vasomotor wave amplitude  
335 increase and frequency reductions (Preiss & Polosa, 1974).

336

### 337 **Sleep physiology vs. MREG<sub>BOLD</sub> spectral entropy**

338 Previous studies have revealed episodes of EEG-verified (Tagliazucchi & Laufs, 2014) and self-reported sleep (Soehner et al.,  
339 2019) during “awake” resting state fMRI scanning conditions. Tagliazucchi et al. found that 30% of subjects fell asleep within  
340 three minutes of starting a resting state fMRI scanning (Tagliazucchi & Laufs, 2014), which is in accord with our present findings.  
341 We also show that SE of the MREG<sub>BOLD</sub> can similarly serve as a metric for brain vigilance state. The 5-10 min awake scan epoch  
342 (A2) and eye closure (EC) interval both showed reduced SE and increased VLF brain pulsation compared to the initial 0-5 minute  
343 scan epoch (A1) (Figs. 3-5), see also (Supplementary table 3 & Fig. 5). Intriguingly, the A2 data showed reduced SE and

344 increased VLF power compared to A1, without onset of EEG-verified sleep. The data also suggest that physiological brain  
345 pulsation changes may precede detectable neuronal activity changes, both during vigilance shifts and in sleep-wake transitions.  
346  
347 The cumulative EEG-based sleep scores based on AASM criteria had a linear correlation with visual cortex MREG<sub>BOLD</sub> spectral  
348 entropy, c.f. Fig 2. The individual subject scan data and sleep scored epoch data both indicated a further decrease in the SE of  
349 the MREG<sub>BOLD</sub> signal upon verified sleep onset. Similar to EEG entropy scores during anesthesia, the MREG<sub>BOLD</sub> data possess  
350 the necessary spectral resolution for accurately determining sleeping state (Burioka et al., 2005; Liang et al., 2012; Mahon et al.,  
351 2008; Rodríguez-Sotelo et al., 2014; Vakkuri et al., 2005). Moreover, mapping of the MREG<sub>BOLD</sub> SE can help localize the source  
352 of EEG brain oscillation changes in deep structures and across the whole brain.  
353  
354 Overall, the MREG<sub>BOLD</sub> spectral power changes during sleep seem to be more widely distributed and spatially uniform than are  
355 the corresponding SE changes with respect to each pulsation mechanism. The spatial similarity of the power vs. entropy maps  
356 declines as a function of decreasing signal frequency. Thus, the map of VLF brain pulsation power increase closely matches the  
357 SE drop in the upper/posterior brain regions and is nearly identical to full band SE maps. The respiratory pulsations tend to  
358 increase in superior brain regions, while the entropy drops in the more basal structures. For the cardiac pulsation band, the power  
359 and entropy changes have little spatial overlap, for reasons yet to be explained.  
360

## 361 **Conclusions**

362  
363 Sleep increases the power of all three physiological brain pulsations and reduces their complexity, as marked by decreased  
364 spectral entropy. The increased pulsation follow the rank order vasomotor > respiratory > cardiac pulsations, with declining  
365 spatial extents. The SE of brain pulsations declines over posterior brain areas even during transient drops in waking vigilance,  
366 making it a very sensitive indicator of physiological pulsation changes in the transition from awake to sleep states. Our results  
367 suggest that all three physiological brain pulsation mechanisms contribute in varying degrees to the increased glymphatic activity  
368 during sleep and may relate to the link between cardiovascular disease and Alzheimer's disease in relation to impaired amyloid  
369 clearance.  
370

## 371 **Material and Methods**

372

### 373 **Subjects**

374 Twenty-five subjects (aged  $28.0 \pm 5.9$  years, 11 females) participated in the study, which was approved by the Regional Ethics  
375 Committee of the Northern Ostrobothnia Hospital District. Written informed consent was obtained from all participants,

376 according to requirements of the Declaration of Helsinki. All subjects were healthy and met the following inclusion criteria: no  
377 continuous medication, no neurological nor cardio-respiratory diseases, non-smokers and no pregnancy. The subjects  
378 participated in two sessions, an Awake scan session in the afternoon ( $7.8 \pm 1.2$  hours sleep in previous night) and the Sleep scan  
379 session in the early morning following a sleepless night (Fig. 2a). The subjects were instructed not to consume caffeine during  
380 the four hours before the Awake scan session and eight hours before the Sleep scan session. Alcohol consumption was prohibited  
381 during the night before the scan.

382

### 383 **Data collection**

384 All subjects were scanned in Oulu (Finland) using a Siemens MAGNETOM Skyra 3T (Siemens Healthineers AG, Erlangen,  
385 Germany) scanner with a 32-channel head coil. The subjects were scanned with ultrafast fMRI sequence, MREG, in synchrony  
386 with a previously described multimodal scanning setup (Korhonen et al., 2014). MREG is a single-shot sequence that  
387 undersamples k-space with an in/out stack-of-spiral trajectories in three dimensions (Assländer et al., 2013; Lee, Zahneisen,  
388 Hugger, LeVan, & Hennig, 2013; Zahneisen et al., 2012). The following parameters were used for MREG: repetition time (TR  
389 = 100ms), echo time (TE = 36ms), and flip angle (FA = 5°), field of view (FOV = 192 mm<sup>3</sup>) and 3 mm cubic voxel. Parameters  
390 for three-dimensional structural T1 MPRAGE were TR = 1900 msec, TE = 2.49 msec, FA = 9°, FOV = 240 mm<sup>3</sup>, and slice  
391 thickness 0.9 mm. MREG data were reconstructed using L2-Tikhonov regularization with lambda 0.1, with the latter  
392 regularization parameter determined by the L-curve method with a MATLAB recon-tool from sequence developers (Hugger et  
393 al., 2011).

394

395 During the Awake scan session, two MREG scans were recorded: a) ten-minute resting state, eyes open, awake scan (A<sub>1-2</sub>)  
396 fixating on a cross on the screen, a) five-minute resting state with EEG (EC) (Fig.2a). During the Sleep scan session three days  
397 later, one or two MREG sequences were recorded : a) the first ten-minute sleep scan (S<sub>1-2</sub>), b) the second ten-minute Sleep scan  
398 (S<sub>3-4</sub>), whereupon subjects were allowed to fall asleep *ad libitum*. They were advised to contact the staff if they were not feeling  
399 at all somnolent after the first scan, which would result in termination of the session. Due to individual differences in awake  
400 vigilance and in the ability to sleep in the MRI (despite presenting a dark and relatively quiet environment), the ten-minute scans  
401 were cut into five-minute segments (A<sub>1</sub>, A<sub>2</sub>, S<sub>1</sub>, S<sub>2</sub>, S<sub>3</sub> and S<sub>4</sub>) to separate more effectively awake and sleep states for further  
402 analysis. An anatomical MR scan was performed at the end of both sessions.

403

404 EEG (0.01 Hz high-pass filtering) was recorded using Electrical Geodesics (EGI, Magstim Company Ltd, Whitland, UK) MR-  
405 compatible GES 400 system, with a 256-channel high density net. Electrode impedances were <50 kΩ and sampling rate 1 kHz  
406 (six subjects 250 Hz). Signal quality was tested outside the scanner room by recording 30 seconds of EEG with eyes open and  
407 eyes closed. Respiratory belt and fingertip peripheral SpO<sub>2</sub> and anesthesia monitor data (ECG, fingertip peripheral SpO<sub>2</sub> and

408 end-tidal carbon dioxide (EtCO<sub>2</sub>), Datex-Ohmeda S/5 Collect software) were measured in synchrony with EEG, as described  
409 previously (Korhonen et al., 2014).

410

411 Two subjects were excluded because of previously un-known sleep apneic breathing patterns during the sleep scan and one  
412 because of low sleep score (only three hours of sleep) before the Awake scan session, compounded by excessive head motion  
413 during MREG acquisition. One subject was excluded from sleep analysis because of compromised MREG sleep data but was  
414 included in the awake vs. EC comparison (Supplementary table 1). One subject was included in the awake vs. sleep comparison,  
415 but no EC data were available.

416

#### 417 **Smart-ring activity data**

418 The subject sleep/wake status was monitored with the Oura-ring sleep tracker ([www.ouraring.com](http://www.ouraring.com)) several days prior to  
419 scanning, data from the 24 hours preceding both scanning sessions was further analyzed. The smart ring records upper limb  
420 motions (3-D accelerometer, 50 Hz), photoplethysmogram (250 Hz) and skin temperature (1/min). The ring had 96% sensitivity  
421 to detect sleep, as previously documented in an independent validation study among healthy young sleepers (de Zambotti, Rosas,  
422 Colrain, & Baker, 2019). In this study, data from the ring was used to confirm that subjects remained awake during the night  
423 before the Sleep scan session. Ring classification of sleep is done in 30 s epochs. To initiate a sleep period, two minutes of full  
424 rest is required, where full rest is detected if the band pass filtered hand acceleration signals stay consistently below 64 mGs in  
425 all three dimensions. Additionally, ring accelerometer data must indicate low activity levels and the photoplethysmogram signal  
426 must indicate stable heart rate dynamics and pulse amplitude characteristics, if sleep is to be registered. Oura ring data were  
427 available for 21 subjects. Total sleep duration was calculated from the 24 hour periods preceding both scanning sessions  
428 (Supplementary Fig. 1).

429

#### 430 **CANTAB tests**

431 At the beginning of scanning sessions, prior to actual scans, the subjects underwent a reaction time (RTI) and paired-associate  
432 learning (PAL) tests from the CANTAB (Cambridge Neuropsychological Test Automated Battery, Cambridge, UK) test battery,  
433 performed on a tablet computer. The CANTAB test is widely used to study cognitive state and vigilance.

434

#### 435 **Preprocessing and analysis of MREG data**

436 After reconstruction, MREG data were preprocessed and analyzed using FSL (5.09 BET software (Jenkinson, Mark, Beckmann,  
437 Behrens, Woolrich, & Smith, 2012; Smith, 2002)), AFNI (Analysis of Functional NeuroImages, v2) and MATLAB (vR2018b;  
438 The Math Work, Natick, MA). The brain was extracted from structural 3D MPRAGE volumes with parameters  $f=0.25$  and  
439  $g=0.22$  using neck clean-up and bias field correction options (Smith, 2002). The functional data preprocessing was done in the  
440 FSL pipeline. The data were high-pass filtered with a cut-off frequency of 0.008 Hz, and head motions were corrected with FSL

441 5.08 MCFLIRT software (Jenkinson, M., Bannister, Brady, & Smith, 2002). Spatial smoothing was done with *fslmaths* using a  
442 5 mm FWHM Gaussian kernel. The highest spikes in the MREG data time series were removed using the *3dDespike* function in  
443 AFNI. Data were registered into MNI space at 3-mm resolution for comparable analysis between subjects and separated into  
444 five-minute scan epochs (A<sub>1</sub>-S<sub>4</sub>, 2861 time points) using FSL function *fslroi*.

445

#### 446 **Preprocessing and analysis of EEG data**

447 EEG recordings were preprocessed using the Brain Vision Analyzer (Version 2.1; Brain Products) after converting to acceptable  
448 format via BESA Research (Version 7.0). Gradient artifacts due to static and dynamic magnetic fields during MRI data  
449 acquisition and the ballistocardiographic (BCG) artifacts were corrected using the average artifact subtraction method (Allen,  
450 Polizzi, Krakow, Fish, & Lemieux, 1998; Allen, Josephs, & Turner, 2000). Checking for absence of gradient of BCG artifacts  
451 was done manually by visual inspection. After preprocessing, EEG data were visualized according to the 10-20 system  
452 instructions for sleep state scoring. Two experienced specialists in clinical neurophysiology, who were specially trained in sleep  
453 studies scored the EEG data. The scoring was performed in 30 s time segments following the AASM guidelines for clinical sleep  
454 studies (AASM, 2017), and the final sleep state scoring was obtained by consensus. Using established criteria, EEG epochs were  
455 scored as awake, N1 (light sleep), N2 (intermediate sleep with sleep spindles and/or K-complexes), N3 (slow wave sleep) or  
456 REM (sleep with rapid eye movements).

457

458 The number of 30 s time segments was multiplied with a sleep weight coefficient (awake=0, N1=1, N2=2, N3=3) for EEG based  
459 sleep scores for a given scan epoch. All 30 s time segments of a five-minute scan epoch were added to the EEG weighted sleep  
460 score. A fully awake five-minute session corresponds to a minimum EEG weighted sleep score of 0 and a five-minute epoch of  
461 N3 sleep corresponds to a maximum EEG weighted sleep score of 30. Data were included if sleep states and SE were both  
462 available (A<sub>1</sub>: n=12, A<sub>2</sub>: n=12, EC: n=13, S<sub>1</sub>: n=12, S<sub>2</sub>: n=12, S<sub>3</sub>: n=10 and S<sub>4</sub>: n=10, Supplementary table 2).

463

464 Although fMRI scanning introduces artifacts in the simultaneous EEG, we employed standard EEG clean-up strategies and  
465 obtained qualitatively adequate EEG for scoring from 12 subjects. EEG was measured for all subjects, but data from a subset of  
466 (n=10) subjects was inadequate for EEG sleep scoring due to a data cable artifact that was discovered only after final scanner  
467 artifact removal. However, the SE of MREG<sub>BOLD</sub> proved to be sensitive tool to evaluate sleep induced physiological changes,  
468 with an accuracy for detecting sleep at least as good as that from EEG-scored sleep data. We did not undertake pre-screening for  
469 sleep apnea or other sleep disorders, since all included subjects were young, and reported themselves to be healthy. However, as  
470 noted above, breath interruptions during sleep scans were detected in two subjects, leading to exclusion of their data from further  
471 analysis.

472

## 473 **Vigilance estimation with MREG signal spectral entropy against EEG verification data**

474 SE is a measure of spectral entropy of data and, as such, describes the amount of information contained with a given signal. The  
475 SE method is based on treating the normalized FFT power spectrum as a probability distribution and using this distribution to  
476 calculate the Shannon entropy (Shannon, 1948). Because of the 10 Hz sampling rate of MREG data, calculation of SE becomes  
477 a feasible tool to estimate vigilance changes and sleep from fMRI, thus presenting an alternative to EEG SE analysis (Kumar,  
478 Ramaswamy, & Nath Mallick, 2013; Mahon et al., 2008; Vakkuri et al., 2005).

479  
480 SE entropy was calculated with MATLAB R2019 using the *pentropy* for global MREG signals, as used in earlier fMRI studies  
481 to measure arousal fluctuations (Chang et al., 2016; Liu et al., 2018) and also on a voxel-by-voxel basis. SE analyses were first  
482 performed on all five-minute MREG epochs. Sleep effects were analyzed from both EEG-verified awake (EEG-weighted sleep  
483 score = 0, n=30) and sleep states (EEG-weighted sleep score > 10, n=30) using the five-minute scan epochs that included over  
484 > 50% NREM N1-N3 sleep (Supplementary tables 1-2), and directly from fMRI data by applying the visual cortex ROI ( $SE_{ROI}$ ,  
485 MNI: x 12 ,y -63, z -6),  $MREG_{BOLD} SE_{ROI}$  verified awake (five-minute epochs with highest SE, n = 30) and sleep (five-minute  
486 epochs with lowest SE, n =30). Normal awake vigilance effects were analyzed from  $A_1$  vs.  $A_2$  (n=22),  $A_1$  vs. EC (n=21) and  $A_2$   
487 vs. EC (n=21). The  $SE_{ROI}$  was also analyzed by linear regression analysis with EEG-based sleep weighted score. The  $SE_{GLOBAL}$   
488 and  $SE_{ROI}$  values were used to verify awake (EEG-weighted sleep score = 0, n=30) and sleep status (EEG-weighted sleep score  
489 > 10, n=30) against EEG based sleep score in receiver operating curve (ROC)-analysis for combined sensitivity and specificity  
490 of the SE MREG (Origin, 2019).

491

## 492 **FFT power spectral analysis of MREG signal**

493 The VLF range of 0.008-0.1 Hz was chosen to get maximum coverage possible of the low frequencies without cross-talk with  
494 respiratory frequencies. Group cardiorespiratory frequency ranges were obtained from individual anesthesia and/or scanner  
495 physiological monitoring signals for FFT power analysis: respiratory (0.11-0.44 Hz) and cardiac (0.52-1.6 Hz). Each VLF,  
496 respiratory and cardiac range FFT power density map was calculated with the *3dPeriodogram* function in AFNI for  $A_1$ , EC and  
497  $S_{1-2}$  scans. Awake and sleep states were verified in two ways: 1) EEG verification, where awake state includes those five-minute  
498 scan epochs that have EEG-weighted sleep score = 0 (n=30) whereas sleep state includes those epochs that have EEG-weighted  
499 sleep score > 10 (n=30) and 2)  $MREG_{BOLD} SE_{ROI}$  verification, where awake state includes those five-minute scan epochs that  
500 have highest SE (n=30) and accordingly sleep state includes those epochs that have lowest SE (n=30). The five-minute epochs  
501 consisted of 2861 time points, and non-uniform FFT (NFFT) was conducted with 4096. Data were tapered using the Hamming  
502 window and zero-padded to the FFT length. The sum of VLF, respiratory and cardiac FFT power was calculated from global  
503 and voxel-wise MREG using *fsroi* (choosing the frequency range with bins that refer to frequency range). With FFT power  
504 analysis, we studied how brain pulsations are altered by both vigilance level and sleep state. VLF FFT power results were  
505 correlated with SE results using *fsfcc* function to evaluate their relationship.

506



507 **Statistical information**

508 We used FSL *randomise* with 10,000 permutations, TFCE (Threshold-Free Cluster Enhancement) and family-wise error (false  
509 positive) control along with a two-sample paired t-test model to compare different scan epochs (A1, A2, EC, S1, S2, S3, S4, df  
510 20) and a two-sample unpaired t-test model to compare different states (awake and sleep, df 29) in the voxel-wise SE and the  
511 FFT power analysis. EEG-weighted sleep score was correlated with MREG<sub>BOLD</sub> SE using linear regression (Pearson correlation,  
512 F-test). ROC curves were plotted to show accuracy of SE to separate sleep from awake state. For Oura-ring activity data,  
513 CANTAB performance, cardiorespiratory signals and head motion, statistical differences were calculated by two-sample paired  
514 t-test model using SPSS (IBM SPSS Statistics 26).

515

516 **Cardiorespiratory signals**

517 SpO<sub>2</sub> and EtCO<sub>2</sub> signals were used to verify group cardiorespiratory frequency ranges based on individual ranges recorded for  
518 each subject. In case of poor quality or missing EtCO<sub>2</sub> datasets, the respiration belt data were used to verify the frequency range.  
519 Frequency location of the maximum peak was determined and used to calculate the differences between A<sub>1-2</sub>, EC, S<sub>1-2</sub> and S<sub>3-4</sub>.

520

521 **Motion**

522 In addition to MCFLIRT correction and spike removal of data, we further excluded any effects of head motion. MCFLIRT  
523 relative motion signal was separated to five-minute time segments for comparison with other analysis, and the mean relative  
524 head motion (mm) was calculated. Values were demeaned and used as covariates in statistical analyses of voxel-wise fMRI.

525

526 **Acknowledgements**

527 We would like to thank all study subjects for their participation in the study. We also thank Inglewood Biomedical Editing for  
528 proof-reading and language checking, Tuomas Konttajärvi for assistance in measurements and preprocessing of EEG data, Jani  
529 Häkli, Annastiina Kivipää, Tarja Holtinkoski, Aleksi Rasila, Taneli Hautaniemi, Miia Lampinen and others who assisted in  
530 measurements or participated otherwise. We are thankful for provided devices and data by Oura and Jussi Kantola making the  
531 reconstruction of MREG by the CSC – IT Center for Science Ltd., Finland.

532

533 **Author contribution statement**

534 HH, VKo, SCH, JK, MJ, VB, MN, VKi designed research; HH, VKo, NH, MJ, VR, VB, VKi performed research; HH, VKo,  
535 JP, MK, TV, NH, LR, JT, JK, TT, VB, VKi analyzed the data, HK provided Oura measurement device and data, HH, VKo,  
536 SCH, JP, MK, TV, NH, LR, JT, JK, MJ, VR, TT, VB, HK, MN, VKi wrote the paper.

537

538 **Competing interests**

539 Oura Health Ltd.'s provided the surveillance Oura rings for the study.

540

541 **Materials & Correspondence**

542 Data of this study are available from the corresponding author (VKi) upon request.

543

544 **Funding**

545 This work was supported by Uniogs/MRC Oulu DP-grant (HH, JK), Pohjois-Suomen Terveystieteiden tutkimuskeskus (HH, VKo),

546 JAES-Foundation (VKi), Academy of Finland and Aivosäätiö TERVA grant 314497 (VKi), Academy of Finland Grants 275342

547 (VKi), The SalWe Research Program for Mind and Body (Tekes—the Finnish Funding Agency for Technology and Innovation,

548 Grant No. 1104/10) (VKi), Finnish Medical Foundation (VKi), Finnish Neurological Foundation, KEVO grants from Oulu

549 University hospital (VKi), Epilepsy Research Foundation (JK), Finnish Cultural Foundation, North Ostrobothnia Regional Fund

550 (JK), Orion Research Foundation sr (JK), Tauno Tönning Foundation (JK), The University of Oulu Scholarship Foundation (JK),

551 Maire Taponen Foundation sr (JK), Finnish Brain Foundation sr (JK), Instrumentarium Science Foundation sr (JK)

## 552 **References**

553

554 Allen, P. J., Josephs, O., & Turner, R. (2000). A method for removing imaging artifact from continuous EEG recorded during  
555 functional MRI. *NeuroImage*, 12(2), 230-239.

556 Allen, P. J., Polizzi, G., Krakow, K., Fish, D. R., & Lemieux, L. (1998). Identification of EEG events in the MR scanner: The  
557 problem of pulse artifact and a method for its subtraction. *NeuroImage*, 8(3), 229-239.

558 Assländer, J., Zahneisen, B., Hugger, T., Reisert, M., Lee, H. -, LeVan, P., & Hennig, J. (2013). Single shot whole brain  
559 imaging using spherical stack of spirals trajectories. *NeuroImage*, 73, 59-70. doi:10.1016/j.neuroimage.2013.01.065

560 Berger, H. (1901). *Zur lehre von der blutzirkulation in der schädelhöhle des menschen namentlich unter dem einfluss von*  
561 *medikamenten*. Experimentelle Untersuchungen, Jena: Verlag von Gustav Fischer.

562 Biswal, B. B., & Kannurpatti, S. S. (2009). Resting-state functional connectivity in animal models: Modulations by  
563 exsanguination. *Dynamic brain imaging* (pp. 255-274) Springer.

564 Biswal, B., Zerrin Yetkin, F., Haughton, V. M., & Hyde, J. S. (1995). Functional connectivity in the motor cortex of resting  
565 human brain using echo-planar mri. *Magnetic Resonance in Medicine*, 34(4), 537-541.

566 Burioka, N., Miyata, M., Cornélissen, G., Halberg, F., Takeshima, T., Kaplan, D. T., . . . Nomura, T. (2005). Approximate  
567 entropy in the electroencephalogram during wake and sleep. *Clinical EEG and Neuroscience*, 36(1), 21-24.

568 Cajochen, C., Pischke, J., Aeschbach, D., & Borbély, A. A. (1994). Heart rate dynamics during human sleep. *Physiology &*  
569 *Behavior*, 55(4), 769-774.

570 Chang, C., Leopold, D. A., Scholvinck, M. L., Mandelkow, H., Picchioni, D., Liu, X., . . . Duyn, J. H. (2016). Tracking brain  
571 arousal fluctuations with fMRI. *Proceedings of the National Academy of Sciences of the United States of America*,  
572 113(16), 4518-4523. doi:10.1073/pnas.1520613113 [doi]

573 de Zambotti, M., Rosas, L., Colrain, I. M., & Baker, F. C. (2019). The sleep of the ring: Comparison of the ÖURA sleep  
574 tracker against polysomnography. *Behavioral Sleep Medicine*, 17(2), 124-136.

575 Dreha-Kulaczewski, S., Joseph, A. A., Merboldt, K. D., Ludwig, H. C., Gartner, J., & Frahm, J. (2015). Inspiration is the major  
576 regulator of human CSF flow. *The Journal of Neuroscience : The Official Journal of the Society for Neuroscience*, 35(6),  
577 2485-2491. doi:10.1523/JNEUROSCI.3246-14.2015 [doi]

- 578 Dreha-Kulaczewski, S., Joseph, A. A., Merboldt, K. D., Ludwig, H. C., Gartner, J., & Frahm, J. (2017). Identification of the  
579 upward movement of human CSF in vivo and its relation to the brain venous system. *The Journal of Neuroscience : The*  
580 *Official Journal of the Society for Neuroscience*, 37(9), 2395-2402. doi:10.1523/JNEUROSCI.2754-16.2017 [doi]
- 581 Elsenbruch, S., Harnish, M. J., & Orr, W. C. (1999). Heart rate variability during waking and sleep in healthy males and  
582 females. *Sleep*, 22(8), 1067-1071.
- 583 Fujii, K., Heistad, D. D., & Faraci, F. M. (1990). Vasomotion of basilar arteries in vivo. *The American Journal of Physiology*,  
584 258(6 Pt 2), H1829-34. doi:10.1152/ajpheart.1990.258.6.H1829 [doi]
- 585 Fultz, N. E., Bonmassar, G., Setsompop, K., Stickgold, R. A., Rosen, B. R., Polimeni, J. R., & Lewis, L. D. (2019). Coupled  
586 electrophysiological, hemodynamic, and cerebrospinal fluid oscillations in human sleep. *Science*, 366(6465), 628-631.
- 587 Hablitz, L. M., Vinitzky, H. S., Sun, Q., Stæger, F. F., Sigurdsson, B., Mortensen, K. N., . . . Nedergaard, M. (2019). Increased  
588 glymphatic influx is correlated with high EEG delta power and low heart rate in mice under anesthesia. *Science*  
589 *Advances*, 5(2), eaav5447.
- 590 Hadaczek, P., Yamashita, Y., Mirek, H., Tamas, L., Bohn, M. C., Noble, C., . . . Bankiewicz, K. (2006). The “perivascular  
591 pump” driven by arterial pulsation is a powerful mechanism for the distribution of therapeutic molecules within the brain.  
592 *Molecular Therapy*, 14(1), 69-78.
- 593 Hiltunen, T., Kantola, J., Elseoud, A. A., Lepola, P., Suominen, K., Starck, T., . . . Matias Palva, J. (2014). Infra-slow EEG  
594 fluctuations are correlated with resting-state network dynamics in fMRI. *Journal of Neuroscience*, 34(2), 356-362.
- 595 Hugger, T., Zahneisen, B., LeVan, P., Lee, K. J., Lee, H. L., Zaitsev, M., & Hennig, J. (2011). Fast undersampled functional  
596 magnetic resonance imaging using nonlinear regularized parallel image reconstruction. *PloS One*, 6(12), e28822.  
597 doi:10.1371/journal.pone.0028822 [doi]
- 598 Huotari, N., Raitamaa, L., Helakari, H., Kananen, J., Raatikainen, V., Rasila, A., . . . Kiviniemi, V. J. (2019). Sampling rate  
599 effects on resting state fMRI metrics. *Frontiers in Neuroscience*, 13, 279.
- 600 Hutchison, R. M., Womelsdorf, T., Allen, E. A., Bandettini, P. A., Calhoun, V. D., Corbetta, M., . . . Chang, C. (2013).  
601 Dynamic functional connectivity: Promise, issues, and interpretations. *NeuroImage*, 80, 360-378.
- 602 J. Kiviniemi, V., Haanpää, H., Kantola, J., Jauhiainen, J., Vainionpää, V., Alahuhta, S., & Tervonen, O. (2005). Midazolam  
603 sedation increases fluctuation and synchrony of the resting brain BOLD signal. *Magnetic Resonance Imaging*, 23(4),  
604 531-537. doi:<http://dx.doi.org/10.1016/j.mri.2005.02.009>

- 605 Jenkinson, M., Beckmann, C. F., Behrens, T. E., Woolrich, M. W., & Smith, S. M. (2012). Fsl. *NeuroImage*, 62(2), 782-790.
- 606 Jenkinson, M., Bannister, P., Brady, M., & Smith, S. (2002). Improved optimization for the robust and accurate linear  
607 registration and motion correction of brain images. *NeuroImage*, 17(2), 825-841.
- 608 Keinänen, T., Rytty, S., Korhonen, V., Huotari, N., Nikkinen, J., Tervonen, O., . . . Kiviniemi, V. (2018). Fluctuations of the  
609 EEG-fMRI correlation reflect intrinsic strength of functional connectivity in default mode network. *Journal of*  
610 *Neuroscience Research*, 96(10), 1689-1698.
- 611 Kiviniemi, V., Jauhainen, J., Tervonen, O., Pääkkö, E., Oikarinen, J., Vainionpää, V., . . . Biswal, B. (2000). Slow vasomotor  
612 fluctuation in fMRI of anesthetized child brain. *Magnetic Resonance in Medicine*, 44(3), 373-378.
- 613 Kiviniemi, V., Wang, X., Korhonen, V., Keinanen, T., Tuovinen, T., Autio, J., . . . Nedergaard, M. (2016). Ultra-fast magnetic  
614 resonance encephalography of physiological brain activity - glymphatic pulsation mechanisms? *Journal of Cerebral*  
615 *Blood Flow and Metabolism : Official Journal of the International Society of Cerebral Blood Flow and Metabolism*,  
616 36(6), 1033-1045. doi:10.1177/0271678X15622047
- 617 Klose, U., Strik, C., Kiefer, C., & Grodd, W. (2000). Detection of a relation between respiration and CSF pulsation with an  
618 echoplanar technique. *Journal of Magnetic Resonance Imaging*, 11(4), 438-444.
- 619 Kondo, H., Ozone, M., Ohki, N., Sagawa, Y., Yamamichi, K., Fukuju, M., . . . Mori, K. (2014). Association between heart rate  
620 variability, blood pressure and autonomic activity in cyclic alternating pattern during sleep. *Sleep*, 37(1), 187-194.
- 621 Korhonen, V. O., Hiltunen, T. K., Myllylä, T. S., Wang, S., Kantola, J., Nikkinen, J., . . . Kiviniemi, V. (2014). Synchronous  
622 multi-scale neuroimaging environment for critically sampled physiological analysis of brain function-hepta-scan concept.  
623 *Brain Connectivity*, (ja)
- 624 Kumar, R., Ramaswamy, R., & Nath Mallick, B. (2013). Local properties of vigilance states: EMD analysis of EEG signals  
625 during sleep-waking states of freely moving rats. *PloS One*, 8(10), e78174. doi:10.1371/journal.pone.0078174 [doi]
- 626 Lee, H., Zahneisen, B., Hugger, T., LeVan, P., & Hennig, J. (2013). Tracking dynamic resting-state networks at higher  
627 frequencies using MR-encephalography. *NeuroImage*, 65, 216-222.
- 628 Liang, S., Kuo, C., Hu, Y., Pan, Y., & Wang, Y. (2012). Automatic stage scoring of single-channel sleep EEG by using  
629 multiscale entropy and autoregressive models. *IEEE Transactions on Instrumentation and Measurement*, 61(6), 1649-  
630 1657.

- 631 Liu, X., de Zwart, J. A., Schölvink, M. L., Chang, C., Frank, Q. Y., Leopold, D. A., & Duyn, J. H. (2018). Subcortical  
632 evidence for a contribution of arousal to fMRI studies of brain activity. *Nature Communications*, *9*(1), 395.
- 633 Ma, Y., Shaik, M. A., Kozberg, M. G., Kim, S. H., Portes, J. P., Timerman, D., & Hillman, E. M. (2016). Resting-state  
634 hemodynamics are spatiotemporally coupled to synchronized and symmetric neural activity in excitatory neurons.  
635 *Proceedings of the National Academy of Sciences of the United States of America*, *113*(52), E8463-E8471.  
636 doi:10.1073/pnas.1525369113 [doi]
- 637 Mahon, P., Greene, B., Lynch, E., McNamara, B., & Shorten, G. (2008). Can state or response entropy be used as a measure of  
638 sleep depth? *Anaesthesia*, *63*(12), 1309-1313.
- 639 Matsumae, M., Kuroda, K., Yatsushiro, S., Hirayama, A., Hayashi, N., Takizawa, K., . . . Sorimachi, T. (2019). Changing the  
640 currently held concept of cerebrospinal fluid dynamics based on shared findings of cerebrospinal fluid motion in the  
641 cranial cavity using various types of magnetic resonance imaging techniques. *Neurologia Medico-Chirurgica*, *59*(4), 133-  
642 146. doi:10.2176/nmc.ra.2018-0272 [doi]
- 643 Mestre, H., Tithof, J., Du, T., Song, W., Peng, W., Sweeney, A. M., . . . Kelley, D. H. (2018). Flow of cerebrospinal fluid is  
644 driven by arterial pulsations and is reduced in hypertension. *Nature Communications*, *9*(1), 4878.
- 645 Preiss, G., & Polosa, C. (1974). Patterns of sympathetic neuron activity associated with mayer waves. *American Journal of*  
646 *Physiology-Legacy Content*, *226*(3), 724-730.
- 647 Raitamaa, L., Korhonen, V., Huotari, N., Raatikainen, V., Hautaniemi, T., Kananen, J., . . . Myllylä, T. (2018). Breath hold  
648 effect on cardiovascular brain pulsations—A multimodal magnetic resonance encephalography study.
- 649 Rayshubskiy, A., Wojtasiewicz, T. J., Mikell, C. B., Bouchard, M. B., Timerman, D., Youngerman, B. E., . . . McKhann II, G.  
650 M. (2014). Direct, intraoperative observation of ~ 0.1 hz hemodynamic oscillations in awake human cortex: Implications  
651 for fMRI. *NeuroImage*, *87*, 323-331.
- 652 Richards, J. E., Boswell, C., Stevens, M., & Vendemia, J. M. (2015). Evaluating methods for constructing average high-density  
653 electrode positions. *Brain Topography*, *28*(1), 70-86.
- 654 Rodríguez-Sotelo, J. L., Osorio-Forero, A., Jiménez-Rodríguez, A., Cuesta-Frau, D., Cirugeda-Roldán, E., & Peluffo, D.  
655 (2014). Automatic sleep stages classification using EEG entropy features and unsupervised pattern analysis techniques.  
656 *Entropy*, *16*(12), 6573-6589.
- 657 Shannon, C. (1948). The mathematical theory of communication. *Bell System Technical Journal*, *27*, 379-423, 623-656.



- 658 Smith, S. M. (2002). Fast robust automated brain extraction. *Human Brain Mapping*, 17(3), 143-155.
- 659 Soehner, A. M., Chase, H. W., Bertocci, M. A., Greenberg, T., Stiffler, R., Lockovich, J. C., . . . Phillips, M. L. (2019).  
660 Unstable wakefulness during resting-state fMRI and its associations with network connectivity and affective  
661 psychopathology in young adults. *Journal of Affective Disorders*, 258, 125-132.
- 662 Somers, V. K., Dyken, M. E., Mark, A. L., & Abboud, F. M. (1993). Sympathetic-nerve activity during sleep in normal  
663 subjects. *New England Journal of Medicine*, 328(5), 303-307.
- 664 Sowho, M., Amatory, J., Kirkness, J. P., & Patil, S. P. (2014). Sleep and respiratory physiology in adults. *Clinics in Chest*  
665 *Medicine*, 35(3), 469-481. doi:10.1016/j.ccm.2014.06.002 [doi]
- 666 Tagliazucchi, E., & Laufs, H. (2014). Decoding wakefulness levels from typical fMRI resting-state data reveals reliable drifts  
667 between wakefulness and sleep. *Neuron*, 82(3), 695-708.
- 668 Trinder, J., Whitworth, F., Kay, A., & Wilkin, P. (1992). Respiratory instability during sleep onset. *Journal of Applied*  
669 *Physiology (Bethesda, Md.: 1985)*, 73(6), 2462-2469. doi:10.1152/jappl.1992.73.6.2462 [doi]
- 670 Vakkuri, A., Yli-Hankala, A., Sandin, R., Mustola, S., Høymork, S., Nyblom, S., . . . Vartiö-Oja, H. (2005). Spectral entropy  
671 monitoring is associated with reduced propofol use and faster emergence in propofol–nitrous oxide–alfentanil anesthesia.  
672 *Anesthesiology: The Journal of the American Society of Anesthesiologists*, 103(2), 274-279.
- 673 Vinje, V., Ringstad, G., Lindstrøm, E. K., Valnes, L. M., Rognes, M. E., Eide, P. K., & Mardal, K. (2019). Respiratory  
674 influence on cerebrospinal fluid flow—a computational study based on long-term intracranial pressure measurements.  
675 *Scientific Reports*, 9(1), 1-13.
- 676 Wang, H. H., Menezes, N. M., Zhu, M. W., Ay, H., Koroshetz, W. J., Aronen, H. J., . . . Wald, L. L. (2008). Physiological  
677 noise in MR images: An indicator of the tissue response to ischemia? *Journal of Magnetic Resonance Imaging: An*  
678 *Official Journal of the International Society for Magnetic Resonance in Medicine*, 27(4), 866-871.
- 679 Wen, H., & Liu, Z. (2016). Broadband electrophysiological dynamics contribute to global resting-state fMRI signal. *The*  
680 *Journal of Neuroscience : The Official Journal of the Society for Neuroscience*, 36(22), 6030-6040.  
681 doi:10.1523/JNEUROSCI.0187-16.2016 [doi]
- 682 Wiegand, L., Zwillich, C. W., & White, D. P. (1989). Collapsibility of the human upper airway during normal sleep. *Journal of*  
683 *Applied Physiology (Bethesda, Md.: 1985)*, 66(4), 1800-1808. doi:10.1152/jappl.1989.66.4.1800 [doi]

- 684 Worsnop, C., Kay, A., Pierce, R., Kim, Y., & Trinder, J. (1998). Activity of respiratory pump and upper airway muscles during  
685 sleep onset. *Journal of Applied Physiology*, 85(3), 908-920.
- 686 Xie, L., Kang, H., Xu, Q., Chen, M. J., Liao, Y., Thiyagarajan, M., . . . Nedergaard, M. (2013). Sleep drives metabolite  
687 clearance from the adult brain. *Science (New York, N.Y.)*, 342(6156), 373-377. doi:10.1126/science.1241224 [doi]
- 688 Yamada, S., Miyazaki, M., Yamashita, Y., Ouyang, C., Yui, M., Nakahashi, M., . . . McComb, J. G. (2013). Influence of  
689 respiration on cerebrospinal fluid movement using magnetic resonance spin labeling. *Fluids and Barriers of the CNS*,  
690 10(1), 36.
- 691 Zahneisen, B., Hugger, T., Lee, K. J., Levan, P., Reisert, M., Lee, H. -, . . . Hennig, J. (2012). Single shot concentric shells  
692 trajectories for ultra fast fMRI. *Magnetic Resonance in Medicine*, 68(2), 484-494. doi:10.1002/mrm.23256
- 693 Zou, Q., Yuan, B. K., Gu, H., Liu, D., Wang, D. J., Gao, J. H., . . . Zang, Y. F. (2015). Detecting static and dynamic  
694 differences between eyes-closed and eyes-open resting states using ASL and BOLD fMRI. *PloS One*, 10(3), e0121757.  
695 doi:10.1371/journal.pone.0121757 [doi]
